# Supplementary material for: Comparison of gene expression of Paramecium bursaria with and without Chlorella variabilis symbionts
Source: PubMed Central journal article supplement (PMC4029085; doi:10.1186/1471-2164-15-183), 2014-03-10

*Paramecium bursaria*

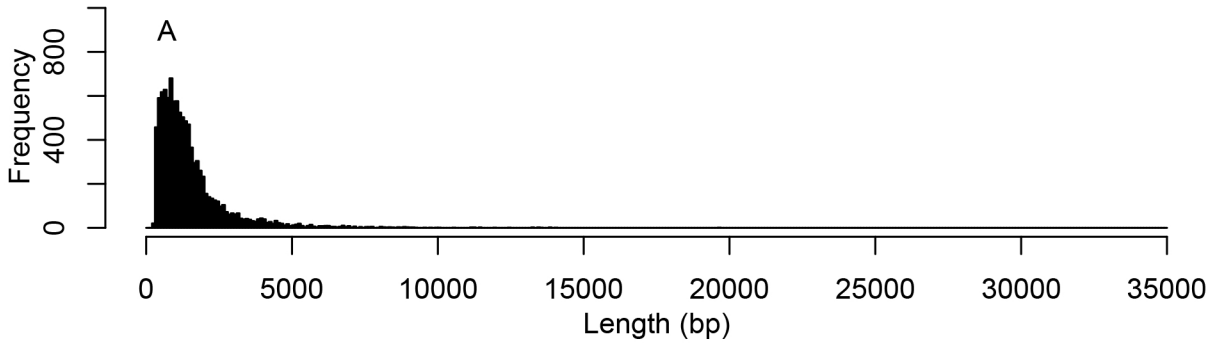

*Paramecium tetraurelia*

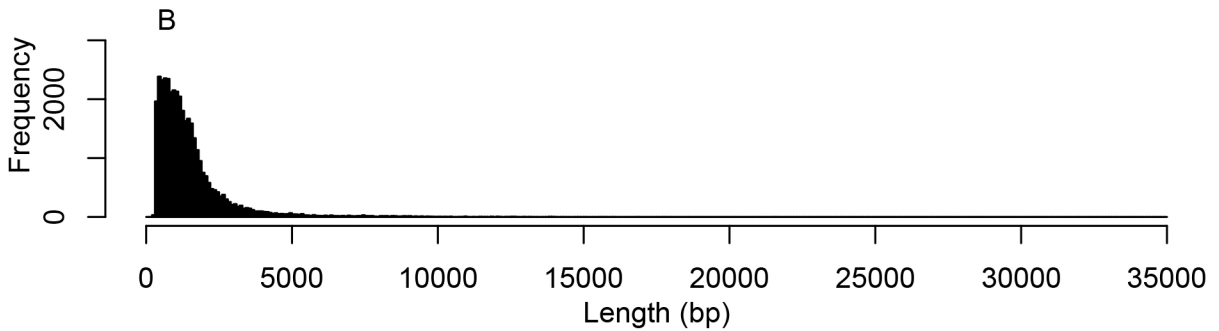

*Tetrahymena thermophila*

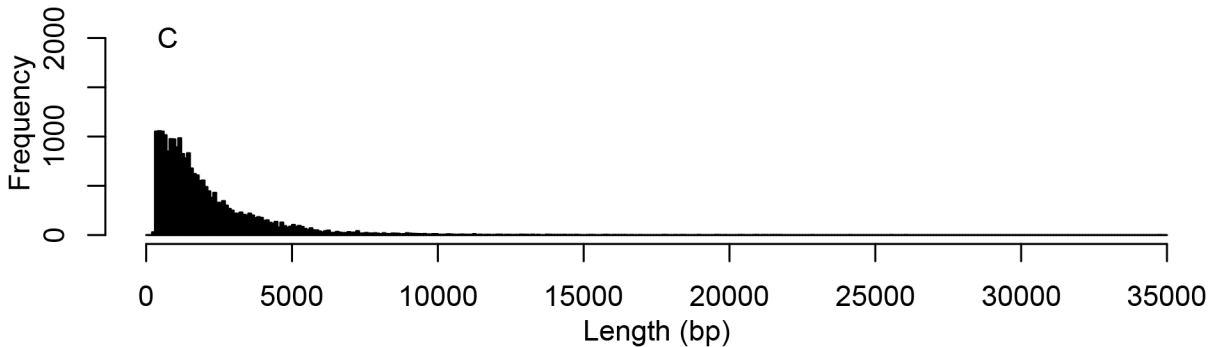

Supplement: 12864_2013_7024_MOESM1_ESM.pdf [file 12864_2013_7024_MOESM1_ESM.pdf]
